# Supplementary material for: Calibration and Validation of the Youth Activity Profile as a Physical Activity and Sedentary Behaviour Surveillance Tool for English Youth
Source: MDPI journal article supplement (doi:10.3390/ijerph16193711), 2019-10-02
Supplement: s1 [file s1]

## English YAP cross-validation results

### Student-level

YAP vs SWA (% segment time; 3 CV schools)

|                                | YAP<br>(% time) | SWA<br>(% time) | Correlation (r) | %MAPE |
|--------------------------------|-----------------|-----------------|-----------------|-------|
| In school<br>MVPA<br>n=129     | 36.9 (10.9)     | 35.1 (17.8)     | .72             | 66.0  |
| Out<br>school<br>MVPA<br>n=127 | 15.1 (4.0)      | 14.7 (8.6)      | .42             | 76.3  |
| Weekend<br>MVPA<br>n=117       | 12.5 (4.3)      | 12.7 (0.1)      | .52             | 147.3 |
| Out<br>school ST<br>n=127      | 55.2 (16.2)     | 53.8 (21.9)     | .79             | 46.3  |

YAP vs SWA (min/week; 3 CV schools)

|                             | YAP<br>(min/week) | SWA<br>(min/week) | Correlation (r) | %MAPE |
|-----------------------------|-------------------|-------------------|-----------------|-------|
| In school<br>MVPA<br>n=129  | 261.8<br>(82.7)   | 244.4<br>(128.2)  | .11             | 70.8  |
| Out school<br>MVPA<br>n=127 | 321.1<br>(89.3)   | 290.6<br>(171.3)  | .45             | 83.9  |
| Weekend<br>MVPA<br>n=117    | 224.1<br>(77.4)   | 229.5<br>(163.8)  | .52             | 199.6 |
| Out school<br>ST n=127      | 1165.7<br>(343.8) | 1056.4<br>(435.4) | .80             | 50.6  |
