# Supplementary material for: Calibration and Validation of the Youth Activity Profile as a Physical Activity and Sedentary Behaviour Surveillance Tool for English Youth
Source: MDPI journal article supplement (doi:10.3390/ijerph16193711), 2019-10-02
Supplement: s1 [file s1]

## English YAP calibration models and equations

### In-school MVPA calibration model

| n=200                       | $\beta$ | SE   | p     |
|-----------------------------|---------|------|-------|
| Intercept (Primary level)   | 45.51   | 9.14 | <.001 |
| Intercept (Secondary level) | 13.72   | 5.58 | .011  |
| Sex                         | -11.34  | 2.47 | <.001 |
| YAP x Primary level         | 1.78    | 2.33 | .45   |
| YAP x Secondary level       | 7.31    | 1.66 | <.001 |

#### *Calibration equations*

- Primary boys:  $\text{YAP \% MVPA} = 45.51 + 1.78 * \text{YAP score}$
- Primary girls:  $\text{YAP \% MVPA} = 45.51 + 1.78 * \text{YAP score} - 11.34$
- Secondary boys:  $\text{YAP \% MVPA} = 13.72 + 7.31 * \text{YAP score}$
- Secondary girls:  $\text{YAP \% MVPA} = 13.72 + 7.31 * \text{YAP score} - 11.34$

### Out-of-school MVPA calibration model

| n=196                       | $\beta$ | SE   | p     |
|-----------------------------|---------|------|-------|
| Intercept (Primary level)   | 12.75   | 5.01 | .012  |
| Intercept (Secondary level) | 2.61    | 3.41 | .45   |
| Sex                         | -1.61   | 1.95 | .41   |
| YAP x Primary level         | 2.01    | 2.06 | .33   |
| YAP x Secondary level       | 4.44    | 1.18 | <.001 |

#### *Calibration equations*

- Primary boys:  $\text{YAP \% MVPA} = 12.75 + 2.01 * \text{YAP score}$
- Primary girls:  $\text{YAP \% MVPA} = 12.75 + 2.01 * \text{YAP score} - 1.61$
- Secondary boys:  $\text{YAP \% MVPA} = 2.61 + 4.44 * \text{YAP score}$
- Secondary girls:  $\text{YAP \% MVPA} = 2.61 + 4.44 * \text{YAP score} - 1.61$

### Weekend MVPA calibration model

| n=187                       | $\beta$ | SE   | p    |
|-----------------------------|---------|------|------|
| Intercept (Primary level)   | 15.17   | 5.02 | .003 |
| Intercept (Secondary level) | 8.44    | 3.18 | .009 |
| Sex                         | -4.33   | 1.56 | .006 |
| YAP x Primary level         | 1.13    | 1.22 | .36  |
| YAP x Secondary level       | 1.44    | 0.90 | .11  |

#### *Calibration equations*

- Primary boys: YAP % MVPA =  $15.17 + 1.13 * \text{YAP score}$
- Primary girls: YAP % MVPA =  $15.17 + 1.13 * \text{YAP score} - 4.33$
- Secondary boys: YAP % MVPA =  $8.44 + 1.44 * \text{YAP score}$
- Secondary girls: YAP % MVPA =  $8.44 + 1.44 * \text{YAP score} - 4.33$

### Out-of-school SB calibration model

| n=196                       | $\beta$ | SE    | p     |
|-----------------------------|---------|-------|-------|
| Intercept (Primary level)   | 34.92   | 12.71 | .007  |
| Intercept (Secondary level) | 48.95   | 8.91  | <.001 |
| Sex                         | 1.61    | 2.99  | .59   |
| YAP x Primary level         | -0.84   | 5.22  | .87   |
| YAP x Secondary level       | 5.65    | 2.54  | .027  |

#### *Calibration equations*

- Primary boys: YAP % SB =  $34.92 - 0.84 * \text{YAP score}$
- Primary girls: YAP % SB =  $34.92 - 0.84 * \text{YAP score} + 1.61$
- Secondary boys: YAP % SB =  $48.95 + 5.65 * \text{YAP score}$
- Secondary girls: YAP % SB =  $48.95 + 5.65 * \text{YAP score} + 1.61$
