# Supplementary material for: Calibration and Validation of the Youth Activity Profile as a Physical Activity and Sedentary Behaviour Surveillance Tool for English Youth
Source: MDPI journal article supplement (doi:10.3390/ijerph16193711), 2019-10-02
Supplement: s1 [file s1]

## US YAP agreement with SWA results

### Individual-level

|                                | YAP<br>(min/week) | SWA<br>(min/week) | YAP-SWA<br>bias<br>(min/week) | %MAPE |
|--------------------------------|-------------------|-------------------|-------------------------------|-------|
| In school<br>MVPA<br>n=329     | 242.7<br>(95.8)   | 259.8<br>(123.3)  | -17.1<br>(149.5)              | 93.4% |
| Out<br>school<br>MVPA<br>n=323 | 228.4<br>(67.2)   | 324.8<br>200.5)   | -96.4<br>(181.8)              | 59.0% |
| Weekend<br>MVPA<br>n=306       | 166.0<br>(237.4)  | 237.4<br>(162.3)  | -71.4<br>(147.3)              | 93.6% |
| Out<br>school ST<br>n=303      | 1548.7<br>(310.1) | 1117.6<br>(448.6) | 431.1<br>(305.1)              | 84.5% |
