# Supplementary material for: Calibration and Validation of the Youth Activity Profile as a Physical Activity and Sedentary Behaviour Surveillance Tool for English Youth
Source: MDPI journal article supplement (doi:10.3390/ijerph16193711), 2019-10-02
Supplement: s1 [file s1]

## English YAP cross-validation results

### School-level

YAP vs SWA (% of segment time; [3 cross-validation schools](#))

|                    | YAP<br>(% time) | SWA<br>(% time) | YAP-SWA bias<br>(% time) |
|--------------------|-----------------|-----------------|--------------------------|
| In-school MVPA     | 36.5 (9.8)      | 34.7 (13.4)     | 1.6 (5.6)                |
| Out-of-school MVPA | 15.0 (2.7)      | 14.5 (4.4)      | 0.5 (1.7)                |
| Weekend MVPA       | 12.3 (4.7)      | 12.5 (5.4)      | -0.2 (0.7)               |
| Out-of-school SB   | 55.9 (19.2)     | 54.5 (20.8)     | 1.4 (1.9)                |

### Additional sub-group analyses

#### School-level

**PRIMARY SCHOOL:** YAP vs SWA (% of segment time; [4 schools](#))

|                    | YAP<br>(% time) | SWA<br>(% time) | YAP-SWA bias<br>(% time) |
|--------------------|-----------------|-----------------|--------------------------|
| In-school MVPA     | 46.5 (0.8)      | 45.6 (1.9)      | 0.9 (14.5)               |
| Out-of-school MVPA | 17.7 (0.3)      | 20.4 (3.4)      | -2.8 (3.4)               |
| Weekend MVPA       | 16.7 (0.6)      | 17.7 (1.1)      | -1.0 (0.6)               |
| Out-of-school SB   | 33.6 (0.1)      | 33.7 (4.6)      | -0.1 (4.6)               |

**SECONDARY SCHOOL:** YAP vs SWA (% of segment time; [5 schools](#))

|                    | YAP<br>(% time) | SWA<br>(% time) | YAP-SWA bias<br>(% time) |
|--------------------|-----------------|-----------------|--------------------------|
| In-school MVPA     | 32.5 (4.9)      | 31.7 (9.6)      | 0.8 (4.8)                |
| Out-of-school MVPA | 14.1 (1.6)      | 14.0 (2.7)      | 0.1 (1.8)                |
| Weekend MVPA       | 10.7 (1.6)      | 10.9 (2.8)      | -0.2 (1.6)               |
| Out-of-school SB   | 67.1 (0.9)      | 66.0 (2.6)      | 1.1 (2.4)                |

**BOYS:** YAP vs SWA (% of segment time; 8 schools)

|                    | YAP<br>(% time) | SWA<br>(% time) | YAP-SWA bias<br>(% time) |
|--------------------|-----------------|-----------------|--------------------------|
| In-school MVPA     | 46.1 (6.6)      | 45.5 (7.3)      | 0.6 (4.8)                |
| Out-of-school MVPA | 16.7 (2.1)      | 18.1 (3.5)      | -1.3 (2.6)               |
| Weekend MVPA       | 15.6 (3.2)      | 14.6 (3.8)      | 1.1 (3.0)                |
| Out-of-school SB   | 49.8 (18.2)     | 48.9 (18.5)     | 0.9 (3.6)                |

**GIRLS:** YAP vs SWA (% of segment time; 8 schools)

|                    | YAP<br>(% time) | SWA<br>(% time) | YAP-SWA bias<br>(% time) |
|--------------------|-----------------|-----------------|--------------------------|
| In-school MVPA     | 32.7 (8.1)      | 31.3 (10.1)     | 1.4 (3.6)                |
| Out-of-school MVPA | 15.3 (2.3)      | 16.5 (5.4)      | -1.3 (3.6)               |
| Weekend MVPA       | 11.8 (3.1)      | 13.8 (4.8)      | -2.0 (2.0)               |
| Out-of-school SB   | 50.9 (17.4)     | 51.4 (17.0)     | -0.6 (3.9)               |
