# Supplementary material for: Calibration and Validation of the Youth Activity Profile as a Physical Activity and Sedentary Behaviour Surveillance Tool for English Youth
Source: Int J Environ Res Public Health. 2019 Oct 2;16(19):3711. doi: 10.3390/ijerph16193711 (PMC6801945; doi:10.3390/ijerph16193711)
Supplement: Supplementary file 1 [file ijerph-16-03711-s001.zip]

Archive with 6 entries (6 files):
- Supplementary file 1. Amendments to original YAP wording.pdf
- Supplementary file 2. YAP.pdf
- Supplementary file 4 REVISED. Individual-level results US YAP vs SWA.pdf
- Supplementary file 5. English YAP calibration models & equations.pdf
- Supplementary file 6 REVISED. Individual-level cross-validation results minutes & percent segment time.pdf
- Supplementary file 7 REVISED. Group-level cross-validation results percent segment time.pdf
